# Supplementary material
Source: publisher figshare collection journal article supplement (https://gsajournals.figshare.com/ndownloader/files/15051533)
Supplement: Supplementary file 1 [file 15051533]

## Sheet: Table S2
Table S2. Results of quantitative real-time PCR analyses of selected genes in drug-treated tg fish versus solvent-treated tg fish.
A	Whole body gene expression in juvenile Cisplatin-treated tg fish compared to solvent-treated tg fish
	Gene	qRT-PCR fold change (mean treated tg vs mean NaCl-treated tg)	p-value (qRT-PCR)	mean relative expression of treated tg (ΔCt(ef1a1-target gene))	mean relative expression of NaCl-treated tg (ΔCt(ef1a1-target gene))	RNA-seq fold change (mean treated tg vs mean NaCl-treated)	p-value (RNA-seq)
	atm	0.481854	0.1118	-12.5233	-11.47	2.23229	6.36582e-05
	gmppb	0.48113	0.0013	-11.1935	-10.138	2.53272	4.08154e-05
	racgap1	0.449066	0.1	-14.6067	-13.4517	3.13729	2.93425e-09
	slc6a19	3.7386	0.002797	-8.34	-10.2425	3.26903	6.92198e-07
	slc26a6	3.13182	0.019	-11.691	-13.338	2.93546	1.6387e-07
	slc3a1	2.00694	0.0127	-9.071	-10.076	2.09775	7.32829e-05
B	Whole body gene expression in juvenile Trametinib-treated tg fish compared to solvent-treated tg fish
	Gene	qRT-PCR fold change (mean treated tg vs mean DMSO-treated tg)	p-value (qRT-PCR)	mean relative expression of treated tg (ΔCt(ef1a1-target gene))	mean relative expression of DMSO-treated tg (ΔCt(ef1a1-target gene))	RNA-seq fold change (mean treated tg vs mean DMSO-treated)	p-value (RNA-seq)
	dusp4	0.185151	0.0009	-16.3172	-13.884	2.68651	2.10049e-09
	dusp6	0.29725	0.0016	-10.4862	-8.736	2.45862	1.60679e-12
	sprouty4	0.397355	0.028	-13.0965	-11.765	3.29764	3.60313e-21
	cish	3.39874	0.0007	-6.15	-7.915	3.24657	3.22502e-09
	mknk2	3.36825	0.0127	-5.173	-6.925	4.42193	0.00044356
	rassf10	2.30893	0.06	-9.45278	-10.66	2.14643	0.00016487
